# Supplementary material for: Underfocus Laser Induced Ni Nanoparticles Embedded Metallic MoN Microrods as Patterned Electrode for Efficient Overall Water Splitting
Source: PubMed Central journal article supplement (PMC8981903; doi:10.1002/advs.202105869), 2022-02-03
Supplement: ADVS-9-2105869-s001.pdf [file ADVS-9-2105869-s001.pdf]

## Supporting Information

for *Adv. Sci.*, DOI 10.1002/adv.202105869

Underfocus Laser Induced Ni Nanoparticles Embedded Metallic MoN Microrods as Patterned Electrode for Efficient Overall Water Splitting

*Yuke Chen, Yijie Wang, Jiayuan Yu, Guowei Xiong, Hongsen Niu, Yang Li, Dehui Sun, Xiaoli Zhang, Hong Liu\* and Weijia Zhou\**

## Supporting Information

for *Adv. Sci.*, DOI: 10.1002/advs.202105869

Underfocus Laser Induced Ni Nanoparticles Embedded  
Metallic MoN Microrods as Patterned Electrode for  
Efficient Overall Water Splitting

*Yuke Chen, Yijie Wang, Jiayuan Yu, Guowei Xiong, Hongsen Niu,  
Yang Li, Dehui Sun, Xiaoli Zhang, Hong Liu\*, Weijia Zhou\**

## **Underfocus Laser Induced Ni Nanoparticles Embedded Metallic MoN Microrods as Patterned Electrode for Efficient Overall Water Splitting**

*Yuke Chen, Yijie Wang, Jiayuan Yu, Guowei Xiong, Hongsen Niu, Yang Li, Dehui Sun, Xiaoli Zhang, Hong Liu\*, Weijia Zhou\**

Y. Chen, Y. Wang, J. Yu, G. Xiong, Dr. D. Sun, Dr. H. Liu, Dr. W. Zhou

Collaborative Innovation Center of Technology and Equipment for Biological Diagnosis and Therapy in Universities of Shandong, Institute for Advanced Interdisciplinary Research (iAIR), University of Jinan, Jinan, 250022, P. R. China  
E-mail: ifc\_zhouwj@ujn.edu.cn (W. Zhou) and hongliu@sdu.edu.cn (H. Liu).

H. Niu, Dr. Y. Li

School of Information Science and Engineering, Shandong Provincial Key Laboratory of Network Based Intelligent Computing, University of Jinan, Jinan 250022, P. R. China

X. Zhang

School of Materials Science and Engineering, Zhengzhou University, Zhengzhou, 450001, China

H. Liu

State Key Laboratory of Crystal Materials, Shandong University, Jinan, 250100, P. R. China

E-mail: hongliu@sdu.edu.cn (H. Liu).

Keywords: Underfocus laser heating, Ni/MoN microrod, Large current density, Superstability, Industrial water-splitting electrolyser

## Experimental Procedures

### 1 Materials

Ni sheet with thickness of 0.08 mm was obtained from the QingHe TengFeng Metal Co. Ltd.. Analytical grade ammonium molybdate tetrahydrate ( $(\text{NH}_4)_6\text{Mo}_7\text{O}_{24}\cdot 4\text{H}_2\text{O}$ ), sodium oxalate ( $\text{Na}_2\text{C}_2\text{O}_4$ ), potassium hydroxide (KOH), hexamethylenetetramine ( $\text{C}_6\text{H}_{12}\text{N}_4$ ), nickel nitrate hexahydrate ( $\text{Ni}(\text{NO}_3)_2\cdot 6\text{H}_2\text{O}$ ), absolute ethanol ( $\geq 99.7\%$ ), sulfuric acid ( $\text{H}_2\text{SO}_4$ , 98.3%), hydrochloric acid (HCl, 36.0~38.0%), 20 wt% Pt/C and ruthenium oxide ( $\text{RuO}_2$ ) were acquired from Yantai Yuandong Fine Chemical Co.. Deionized water was provided by a Barnstead Nanopure Water System (18.2 M $\Omega$ ·cm). Argon (Ar, 99.99 vt%), ammonia ( $\text{NH}_3$ , 99.99 vt %), methane ( $\text{CH}_4$ , 99.99 vt%), mixed gases of argon and hydrogen (10 vt%,  $\text{H}_2/\text{Ar}$ ), and mixed gases of argon and hydrogen sulfide (20 vt%,  $\text{H}_2\text{S}/\text{Ar}$ ) were purchased from Jinan XUSHENG Gases Co., Ltd..

#### 2.1 Synthesis of Ni/MoN microrods on rNS

A fiber laser system (Universal LSF20D, Hgtech Laser, maximum output power 25 W) with a laser wavelength of 1064 nm and pulse duration of 100 ns was performed to induce the formation of Ni nanoparticles embedded metallic MoN microrods on the rNS. First, the commercial Ni sheet was roughened by infocus laser ablation with a scan rate of 1000 mm s<sup>-1</sup>, output power of 12.5 W, and line spacing of 5  $\mu\text{m}$  in linear scan mode. Then rNS was washed orderly with 1 M hydrochloric acid solution, alcohol, and deionized water for 30 min in order to remove organic matter and impurities existed on the surface of rNS. Then, 0.96 g of  $\text{Ni}(\text{NO}_3)_2\cdot 6\text{H}_2\text{O}$  and 0.8 g of  $(\text{NH}_4)_6\text{Mo}_7\text{O}_{24}\cdot 4\text{H}_2\text{O}$  were dissolved into 80 mL deionized water, and the above aqueous solution was added into a 100 mL Teflon autoclave. Next, the obtained rNS was set perpendicularly into above Teflon autoclave, then kept at 150 °C for 6 h. The  $\text{NiMoO}_4\cdot x\text{H}_2\text{O}$  microrods grown on rNS ( $\text{NiMoO}_4\cdot x\text{H}_2\text{O}/\text{rNS}$ ) was acquired when the autoclave cooled down to room temperature naturally. Lastly, the  $\text{NiMoO}_4\cdot x\text{H}_2\text{O}/\text{rNS}$  was placed in a round quartz glass reactor. The  $\text{NH}_3$  gas with flow rate of 50 sccm was used as N source and reducing atmosphere. A fiber laser system (output power of 25 W, scan rate 1000 mm s<sup>-1</sup>, line spacing of 5  $\mu\text{m}$ ) was employed to write regionally

on the  $\text{NiMoO}_4 \cdot x\text{H}_2\text{O}/\text{rNS}$ . The UL was adjusted to 2 cm to generate an underfocus mode, then, the Ni/MoN/rNS was obtained. Furthermore, the different atmospheres (Ar,  $\text{CH}_4$ ,  $\text{H}_2\text{S}$ , and  $\text{H}_2$ ) with UL (2 cm) were also carried out at the same reaction condition to synthesize different samples.

### 2.2. *Synthesis of MoN microrods*

MoN microrods was synthesized by placing the Ni/MoN microrods (scraped from Ni/MoN/rNS) into 1 M  $\text{H}_2\text{SO}_4$  solution for 24 hours under room temperature, subsequently washed by absolute ethyl alcohol and deionized water for several times.

### 2.3 *Synthesis of Ni nanorods*

The  $\text{NiC}_2\text{O}_4 \cdot 2\text{H}_2\text{O}$  nanorods were synthesized by a room temperature stirring route. Typically, a solution of  $\text{Ni}(\text{NO}_3)_2 \cdot 6\text{H}_2\text{O}$  (0.15 g) in 20 mL deionized water and 5 mL absolute ethyl alcohol was added to a solution of  $\text{Na}_2\text{C}_2\text{O}_4$  (0.134 g),  $\text{C}_6\text{H}_{12}\text{N}_4$  (0.14 g) in 20 mL deionized water and 5 mL absolute ethyl alcohol and mixed to obtain a stable solution, and then stirred vigorously at room temperature for 4 h. Finally, the obtained green samples were washed using deionized water and ethanol to remove the impurities, and dried by freezer dryer for 12 hours. The porous Ni nanorods were synthesized via a calcining process of  $\text{NiC}_2\text{O}_4 \cdot 2\text{H}_2\text{O}$  nanorods. The pyrolysis temperature was set at 340 °C. In a typical process, the precursor of  $\text{NiC}_2\text{O}_4 \cdot 2\text{H}_2\text{O}$  was placed in a tube furnace. Then, the furnace was heated to the temperature of 340 °C under Ar flow at a rate of 1 °C  $\text{min}^{-1}$  for 2 h.

## 3. *Materials characterizations*

Phase compositions of the materials were measured using a ARL Equinox 3000X (ThermoFisher) X-ray diffractometer (XRD) with Cu  $K\alpha$  radiation ( $\lambda=0.15406$  nm). Materials morphologies and crystalline structure were identified using a field emission scanning electron microscope (FESEM; HITACHI regulus 8100) and a transmission electron microscope (TEM; Thermo Fischer Talos F200x Field Emission Electron Microscope) at an acceleration voltage of 200 kV. The elementary composition was performed by X-ray photoelectron spectroscopic (XPS) (Shimadzu, AXIS Ultra Supra). The reaction temperature was tested by Thermal Imaging Camera (Fotric 226) and Multimeter. Laser pressure of different focus degree of laser was

tested by Fine electronic balance instrument (SECURA213-1CN). Static contact angle measurements were performed with a JY-PHb apparatus made by Chengde Yote Instrument Co., Ltd., at room temperature in ambient air with 1.5  $\mu\text{L}$  droplets of deionized water. ICP-AES analysis was measured on Model ARCOS FHS12 instrument. Fourier transform infrared spectrum (FT-IR) was collected on a Nicolet Avatar 360 infrared spectrometer using Attenuated Total Reflection (ATR) mode. Raman spectra were collected using a WITec CRM-200 fluorescence/Raman confocal imaging microscope coupled to a Princeton Instruments IsoPlane spectrometer, with a 532 nm excitation laser. The height of sample was detected by Atomic force microscope (AFM) measurements and (New Dimension icon, Bruker). The potential of sample was tested by Kelvin probe force microscopy (KPFM) measurements. The potential distribution of Ni/MoN microrod was detected by Kelvin probe force microscopy (KPFM) with the 50 nm Au film evaporated on Si plate as conductive basement and thus the Fermi level relative positions could be estimate.<sup>1</sup> The following formulas were used to voice the surface potential difference (SPD) between Ni, MoN, and the AFM tip

$$SPD_{Ni} = W_{Tip} - W_{Ni}$$

$$SPD_{MoN} = W_{Tip} - W_{MoN}$$

Where  $W_{Tip}$ ,  $W_{Ni}$ , and  $W_{MoN}$  were the work functions of the AFM Tip, Ni and MoN, respectively. Hence, the difference of Fermi level of Ni ( $E_{F-Ni}$ ) and MoN ( $E_{F-MoN}$ ) could be deduced by the following equation

$$\Delta E_F = E_{F-Ni} - E_{F-MoN} = \Delta SPD = SPD_{Ni} - SPD_{MoN} = W_{MoN} - W_{Ni}$$

In order to obtain the work function of tip, Au film was used as the sample. As the standard sample, the work function of Au ( $W_{Au}$ ) was a constant (5.1 eV) and the  $SPD_{Au} = W_{Tip} - W_{Au} = 0.17$  V, so the  $W_{Tip}$  is 5.27 eV. The  $SPD_{Ni}$  and  $SPD_{MoN}$  were 0.245 V and 0.232 V read from potential image, respectively. Therefore, the work function of  $W_{Ni}$  and  $W_{MoN}$  could be calculated to be 5.025 eV and 5.038 eV, respectively.

#### 4. Electrochemical measurements

Electrochemical measurements were performed on an electrochemical workstation

(CHI 760E, CH Instruments, Inc.) with a standard three-electrode system in 1.0 M KOH electrolyte. Typically, a Hg/HgO electrode and a graphite rod electrode as reference and counter electrodes, respectively. The according potentials were calibrated to a reversible hydrogen electrode (RHE) by adding a value of  $(0.205 + 0.059 \times \text{pH})$ . As for commercial 20 wt% Pt/C and RuO<sub>2</sub> power was well-dispersed in a diluted Nafion alcohol solution (500  $\mu\text{L}$  of ethanol, 450  $\mu\text{L}$  water, and 50  $\mu\text{L}$  of Nafion) to form a homogeneous suspension. Then the above homogeneous suspension was dripped cast on the surface of the rNS at a catalyst loading of 0.5 mg cm<sup>-2</sup>. The electrochemical activity of the samples (rNS, NiMoO<sub>4</sub>·xH<sub>2</sub>O/rNS, Ni/MoN/rNS, RuO<sub>2</sub>/rNS and 20 wt% Pt/C/rNS electrodes) toward the HER and OER were researched via linear sweep voltammetry (LSV) curves with a potential sweep rate of 5 mV s<sup>-1</sup>. Ni/MoN/rNS directly acted as cathode and anode was selected to construct the overall water splitting system. Electrochemical impedance spectroscopy (EIS) was carried out with an amplitude of 10 mV and a frequency range of 100 kHz to 0.01 Hz. The main arc in each EIS spectrum was fitted using a simplified Randles equivalent circuit, which consisted of a resistance (R<sub>s</sub>) in series with a parallel arrangement of a charge transfer resistance (R<sub>ct</sub>) and a constant phase element. Cyclic voltammetry was used to probe the electrochemical double-layer capacitance at non-faradaic potentials to estimate the effective electrode surface area. The current-time responses were monitored using chronoamperometric measurements at large current densities.

The industrial performance of Ni/MoN/rNS were tested under industrial conditions of 30 wt% KOH solution with a temperature of 70 °C, which was carried out by an electrolyser from the Cockerill jingli Hydrogen, China. The Ni/MoN/rNS disc electrodes with diameter of 6 cm were integrated as both anode and cathode, respectively. The mature Ni mesh as both anode and cathode used in industrial hydrogen production system was set as blank electrode. The current density of water splitting was simultaneously monitored at different temperatures.

##### *5. Density Functional Theory (DFT) Calculation*

All the spin-polarized computations were performed by using Vienna ab initio simulation package (VASP).<sup>2, 3</sup> The ion-electron interactions were described by the

projector augmented wave method<sup>4</sup> and the general gradient approximation in the Perdew–Burke–Ernzerhof (PBE) form was used.<sup>5,6</sup> A Ni<sub>10</sub> cluster supported on 2 × 4 MoN (202) slab were used as the models. During the structure relaxation, the convergence criterion was set to 0.03 eV/Å and 10<sup>-5</sup> eV for the residual force and energy, respectively. Brillouin zones were sampled by a Monkhorst-Pack 2 × 3 × 1 k-point grid. To avoid the interaction between two periodic units, a vacuum space of 15 Å was employed.

The HER activity was evaluated by the free energy for hydrogen adsorption ( $\Delta G_{\text{H}}$ )<sup>7</sup>, which was calculated as

$$\Delta G_{\text{H}} = \Delta E + \Delta E_{\text{ZPE}} - T\Delta S$$

where  $\Delta E$ ,  $E_{\text{ZPE}}$ ,  $T$  and  $S$  is the reaction energy difference, zero-point energies, temperature and entropy, respectively.



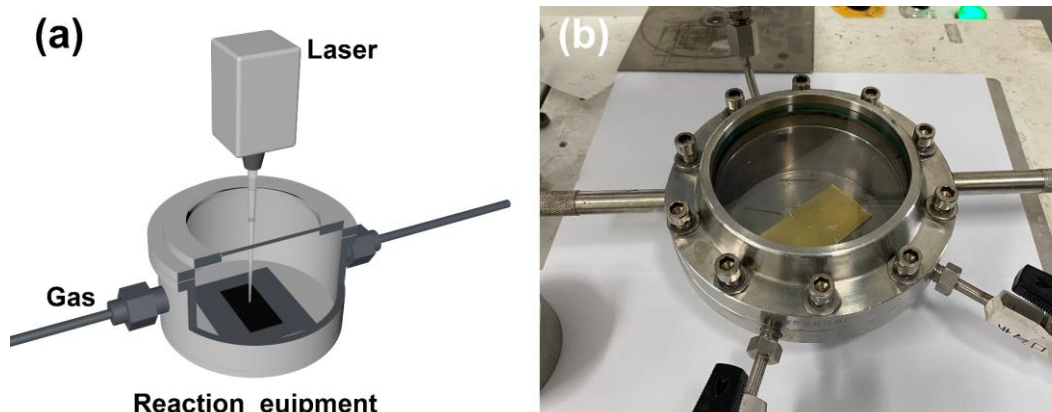

**Figure S1.** (a) Schematic diagram and (b) photograph of reaction chamber with 5 mm thick SiO<sub>2</sub> window, which was used to supplied a stable gas condition for laser heating reaction.

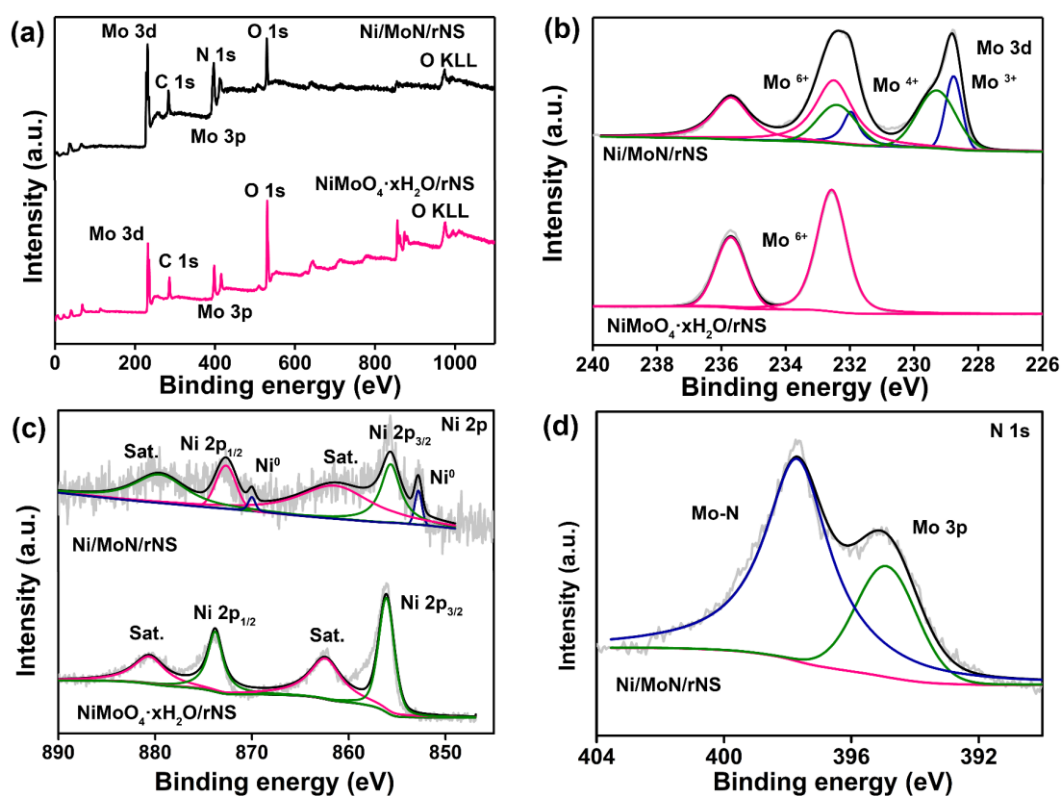

**Figure S2.** (a) Full spectrum X-ray photoelectron spectroscopy (XPS) spectra and high-resolution XPS spectra of (b) Mo 3d and (c) Ni 2p of NiMoO<sub>4</sub>·xH<sub>2</sub>O/rNS and Ni/MoN/rNS (d) N 1s of Ni/MoN/rNS.

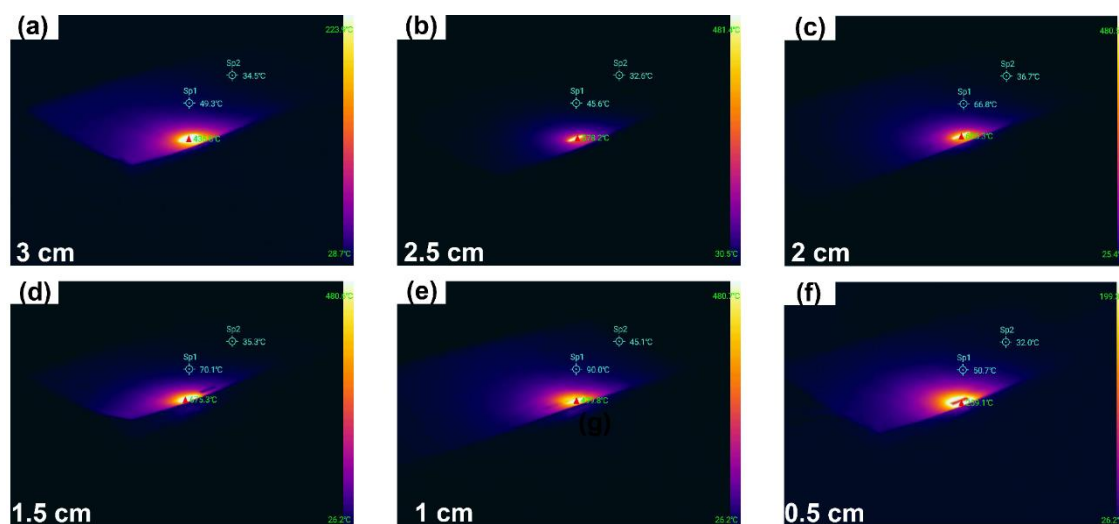

**Figure S3.** (a-f) Thermal imaging pictures of synthesized samples at different degree of underfocus of 3 cm, 2.5 cm, 2 cm, 1.5 cm, 1 cm and 0.5 cm, respectively.

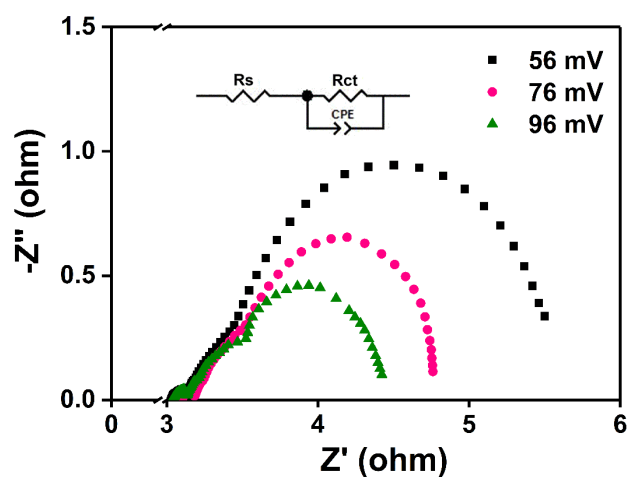

**Figure S4.** EIS Nyquist plots of Ni/MoN/rNS with overpotentials from 56, 76 to 96 mV.

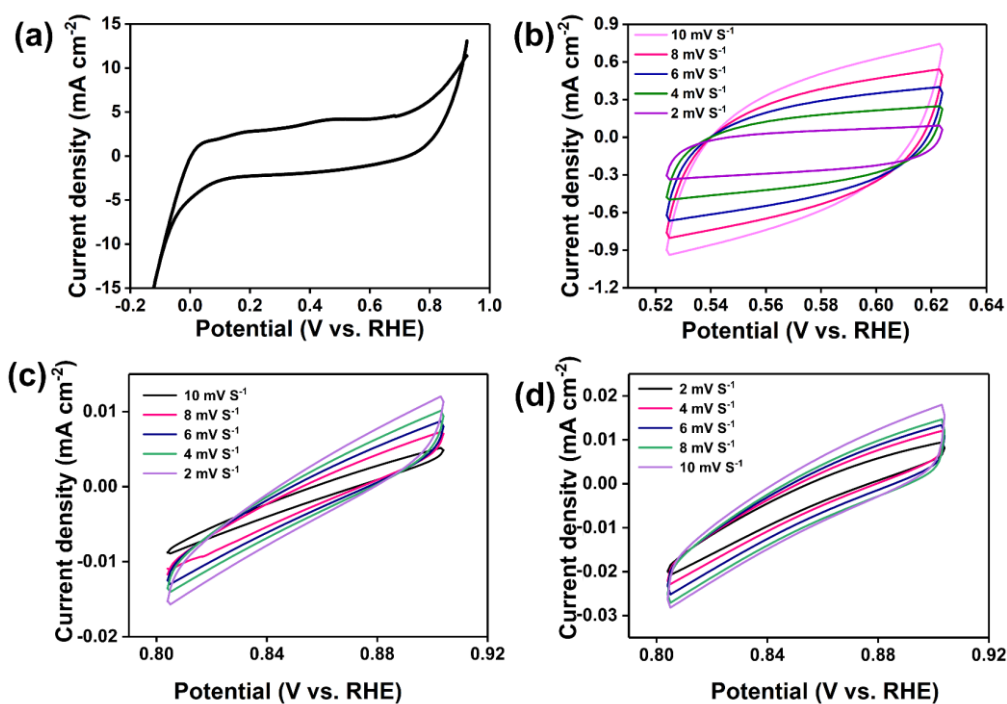

**Figure S5.** (a) The whole curve of Ni/MoN/rNS and cyclic voltammograms without faradaic reactions of (b) Ni/MoN/rNS, (c) rNS, and (d) NiMoO<sub>4</sub>·xH<sub>2</sub>O/rNS.

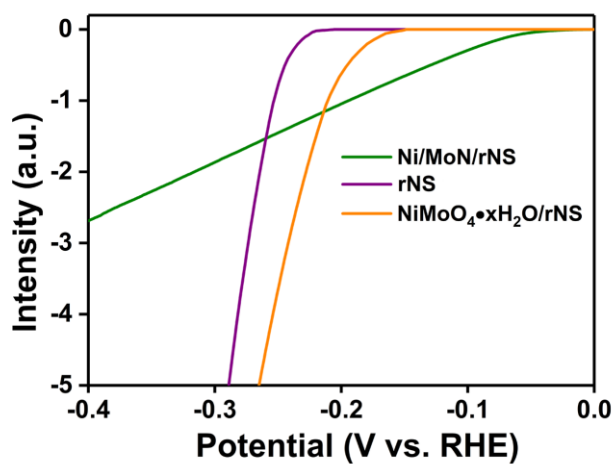

**Figure S6.** Polarization curves of Ni/MoN/rNS, rNS, and NiMoO<sub>4</sub>·xH<sub>2</sub>O/rNS normalized by the respective electrochemical surface area toward HER in 1 M KOH.

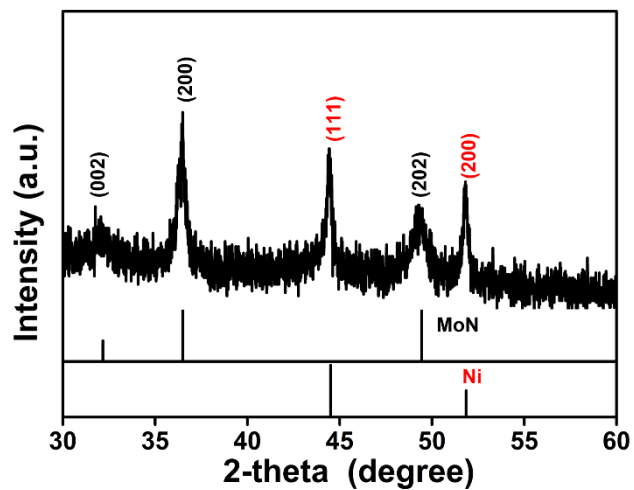

**Figure S7.** XRD pattern of Ni/MoN/rNS after it test for HER.

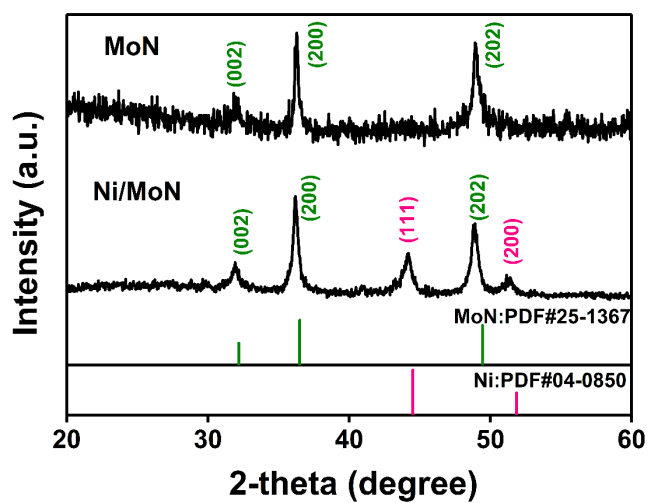

**Figure S8.** XRD pattern of Ni/MoN microrod and MoN microrods.

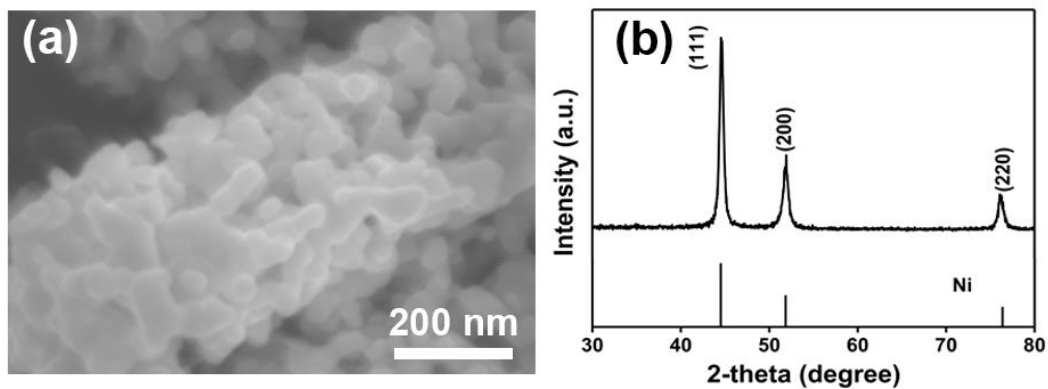

**Figure S9.** (a) SEM image and (b) XRD pattern of porous Ni nanorods.

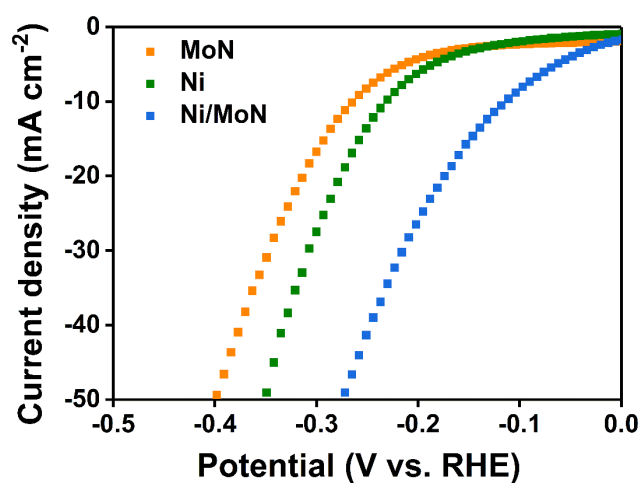

**Figure S10.** LSV curves of Ni/MoN, MoN, and Ni nanorods toward HER in 1 M KOH.

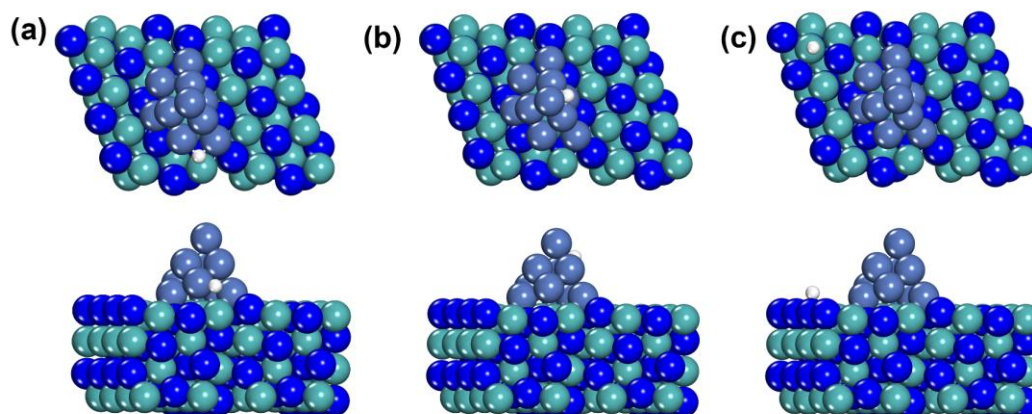

**Figure S11.** The  $\Delta G_{H^*}$  values of hydrogen adsorption on the different sites for (a) MoN-Ni interface, (b) Ni cluster and (c) MoN (202).

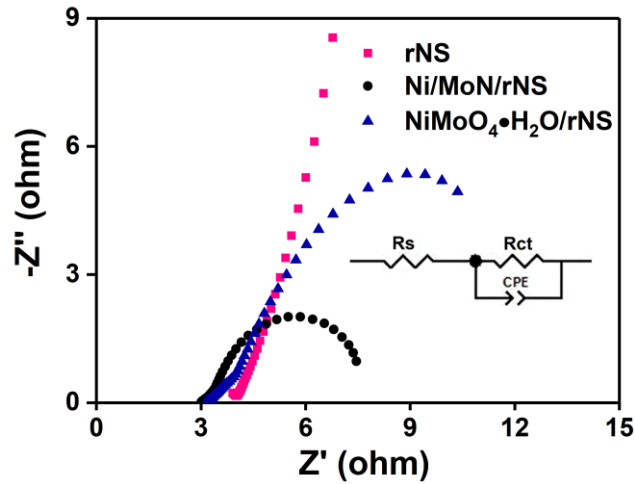

**Figure S12.** Nyquist plots with the overpotential of 300 mV (inset: the equivalent circuit) of rNS, NiMoO<sub>4</sub>·xH<sub>2</sub>O/rNS, Ni/MoN/rNS.

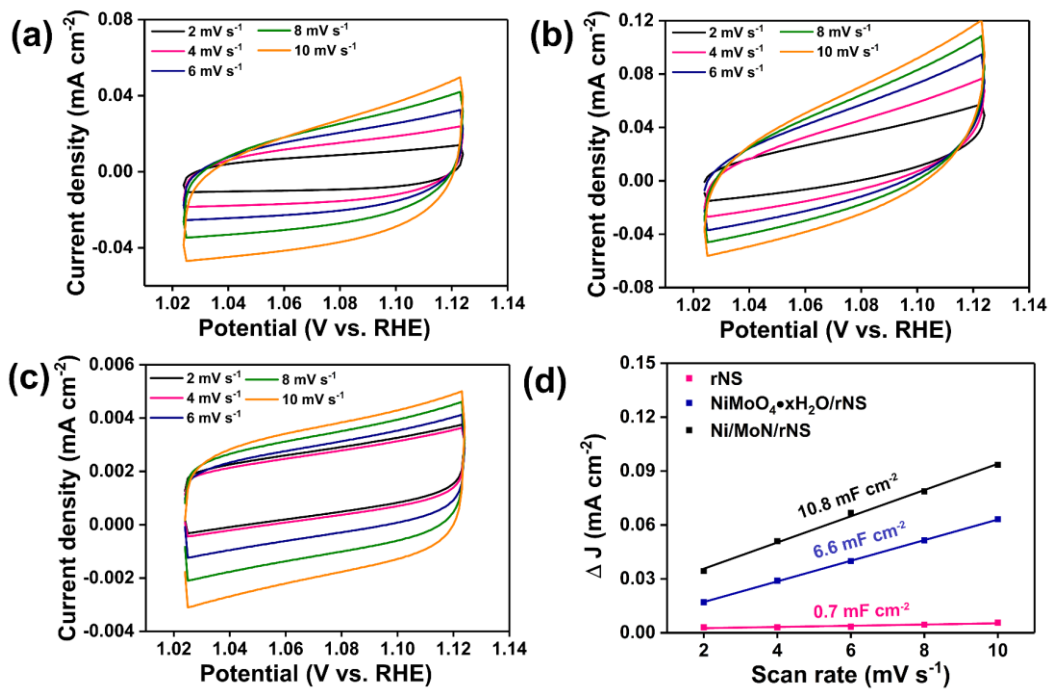

**Figure S13.** Cyclic voltammograms without faradaic reactions of (a) NiMoO<sub>4</sub>·xH<sub>2</sub>O/rNS, (b) Ni/MoN/rNS, and (c) roughened Ni Sheet for alkaline oxygen evolution. (d) Electrochemical area of rNS, NiMoO<sub>4</sub>·xH<sub>2</sub>O/rNS, Ni/MoN/rNS under OER conditions.

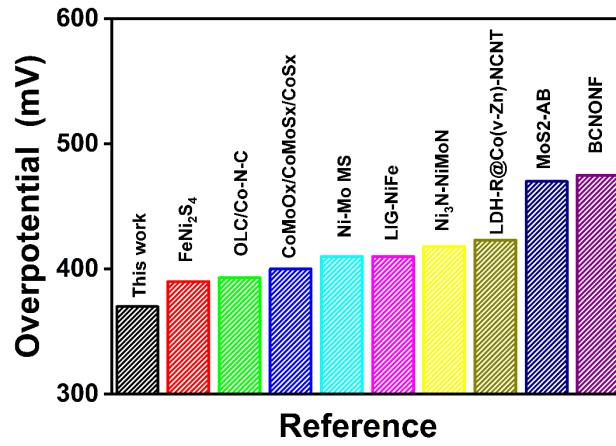

**Figure S14.** Comparison of the required voltage at a current density of  $50 \text{ mA cm}^{-2}$  for the Ni/MoN/rNS with reported state-of-the-art noble metal free catalysts.

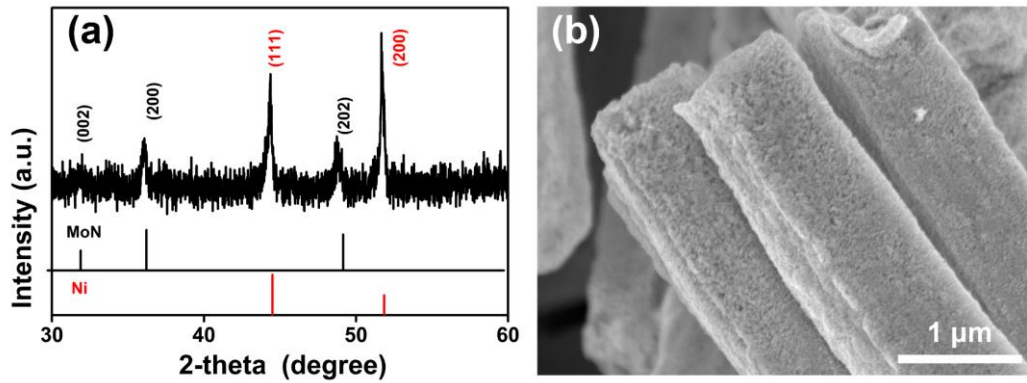

**Figure S15.** XRD pattern and SEM image of Ni/MoN/rNS after it test for OER.

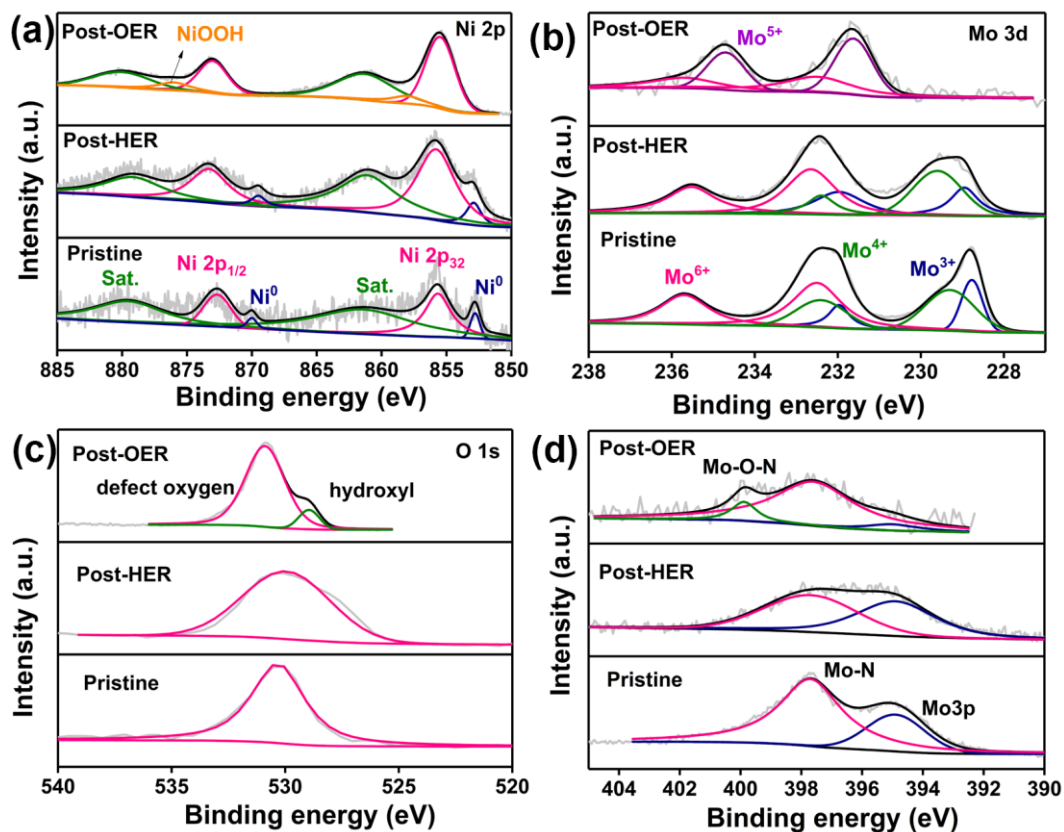

**Figure S16.** XPS spectra of Ni 2p (a), Mo 3d (b), O 1s (c) and N 1s (d) for Ni/MoN/rNS electrodes before and after HER and OER test.

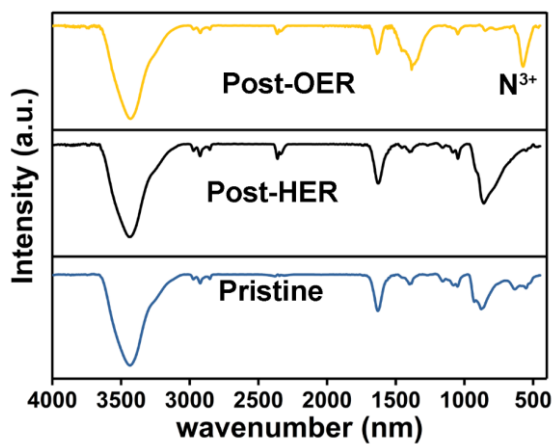

**Figure S17.** FT-IR spectrum of Ni/MoN/rNS before and after HER and OER test.



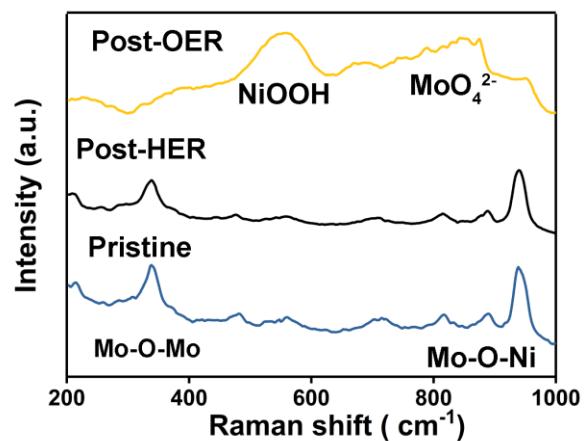

**Figure S18.** Raman spectra of Ni/MoN/rNS before and after i-t test.

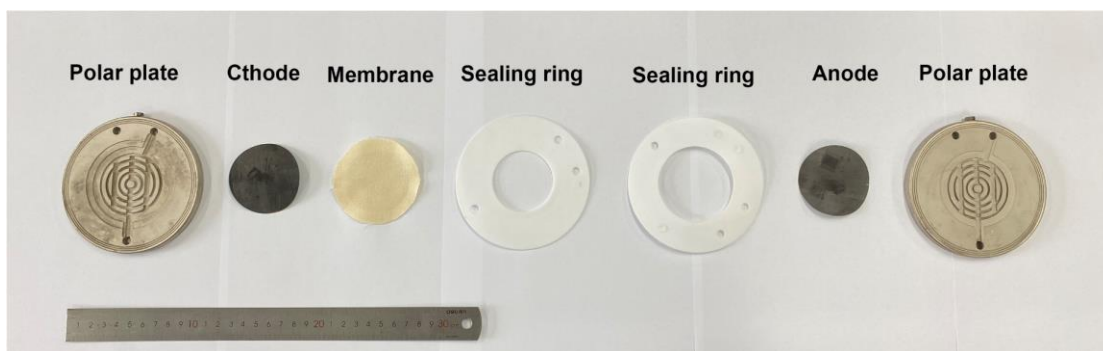

**Figure S19.** Stack structure of the electrolysis cell used in the machine testing.

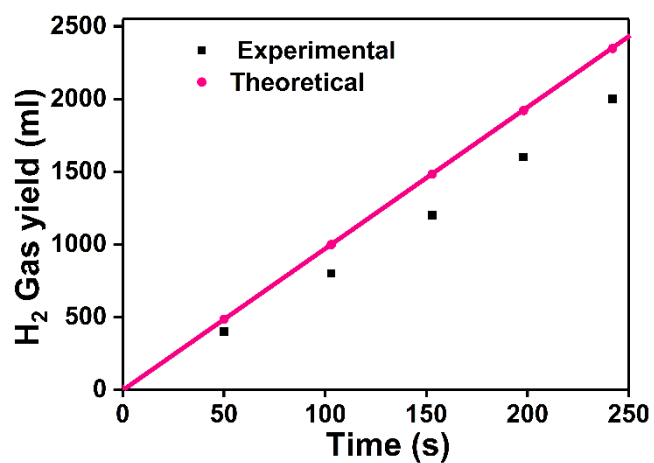

**Figure S20.** Gas evolution during the HER under industrial conditions.

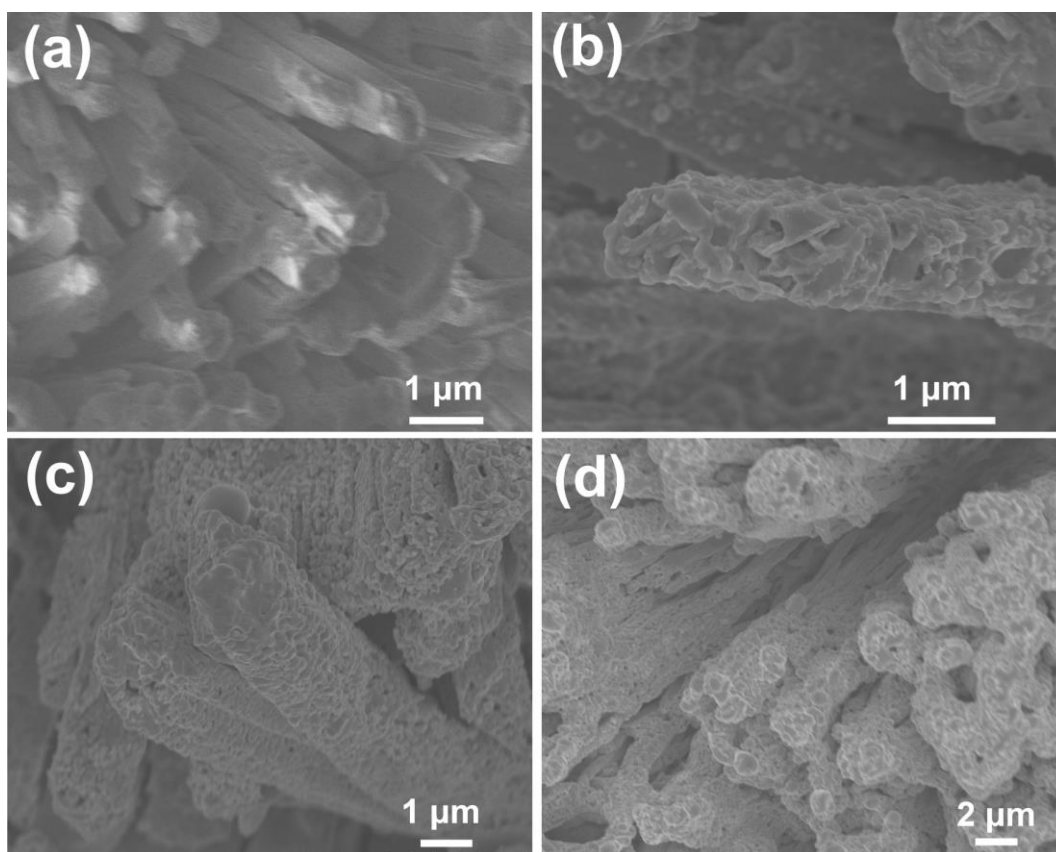

**Figure S21.** SEM images of the NiMoO<sub>4</sub>·xH<sub>2</sub>O/rNS treated by laser under atmosphere of (a) Ar, (b) H<sub>2</sub>, (c) CH<sub>4</sub>, and (d) H<sub>2</sub>S in the underfocus mode.

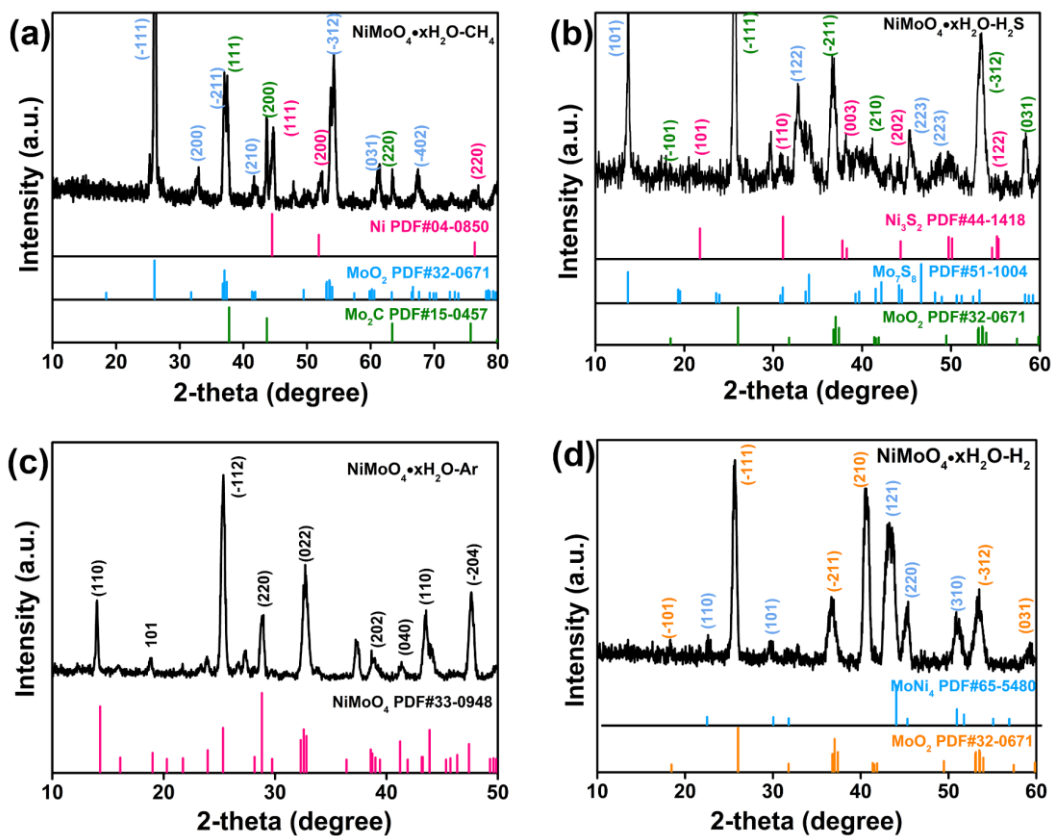

Figure S22. XRD patterns of sample treated at different atmosphere in the underfocus mode.

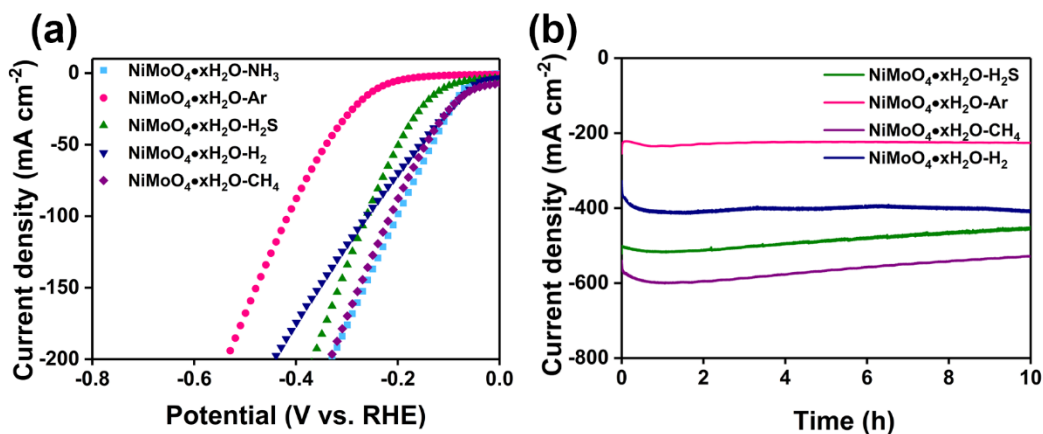

Figure S23. LSV and i-t curves of samples treated at different atmospheric gas in the underfocus mode for HER in 1 M KOH.

Table S1. ICP-AES result of Ni/MoN catalyst.

| Sample | Ni (wt%) | Mo (wt%) | N (wt%) |
|--------|----------|----------|---------|
|--------|----------|----------|---------|

|        |        |        |  |
|--------|--------|--------|--|
| Ni/MoN | 44.91% | 28.39% |  |
|--------|--------|--------|--|

**Table S2.** Comparison of the HER activity of Ni/MoN/rNS with other non-noble-metal electrocatalysts.

| electrocatalysts                                                                   | $\eta_{50}$<br>Overpotential(mV) | Electrolyte | Ref.      |
|------------------------------------------------------------------------------------|----------------------------------|-------------|-----------|
| Ni/MoN/rNS                                                                         | 105 mV                           | 1.0 M KOH   | This work |
| MoO <sub>3</sub> /Ni–NiO                                                           | 143 mV                           | 1.0 M KOH   | 8         |
| MnCo <sub>2</sub> O <sub>4</sub> @Ni <sub>2</sub> P/NF                             | 120 mV                           | 1.0 M KOH   | 9         |
| Ni <sub>2</sub> P/Ni@C                                                             | 220 mV                           | 1.0 M KOH   | 10        |
| meso-Fe-MoS <sub>2</sub> /CoMo <sub>2</sub> S <sub>4</sub>                         | 192 mV                           | 1.0 M KOH   | 11        |
| FeOOH/Ni <sub>3</sub> N                                                            | 140 mV                           | 1.0 M KOH   | 12        |
| Mo-NiCo <sub>2</sub> O <sub>4</sub> /Co <sub>0.547</sub> N/NF                      | 172 mV                           | 1.0 M KOH   | 13        |
| O-CoP-2                                                                            | 145 mV                           | 1.0 M KOH   | 14        |
| Ni/Ni(OH) <sub>2</sub>                                                             | 114 mV                           | 1.0 M KOH   | 15        |
| V-CoP@a-CeO <sub>2</sub>                                                           | 138 mV                           | 1.0 M KOH   | 16        |
| NiMnOP                                                                             | 125 mV                           | 1.0 M KOH   | 17        |
| CdS@CoNiS <sub>x</sub>                                                             | 215 mV                           | 1.0 M KOH   | 18        |
| NiMoS                                                                              | 128 mV                           | 1.0 M KOH   | 19        |
| WMo-NG                                                                             | 145 mV                           | 1.0 M KOH   | 20        |
| Mo-Co <sub>9</sub> S <sub>8</sub> @C                                               | 225 mV                           | 1.0 M KOH   | 21        |
| Ni <sub>2</sub> P/NiTe <sub>2</sub>                                                | 125 mV                           | 1.0 M KOH   | 22        |
| $\beta$ -Mo <sub>2</sub> C@NPCC                                                    | 265 mV                           | 1.0 M KOH   | 23        |
| NFP/C-3                                                                            | 150 mV                           | 1.0 M KOH   | 24        |
| MoP/0.5CA-CDs1100                                                                  | 175 mV                           | 1.0 M KOH   | 25        |
| NiTe <sub>2</sub> NWs                                                              | 190 mV                           | 1.0 M KOH   | 26        |
| Ni <sub>3</sub> Sn <sub>2</sub> S <sub>2</sub> @Ni <sub>3</sub> S <sub>2</sub> NFs | 125 mV                           | 1.0 M KOH   | 27        |

**Table S3.** Comparison of the OER activity of Ni/MoN/rNS with other non-noble-metal electrocatalysts.

| electrocatalysts                 | $\eta_{50}$       |             | Ref.      |
|----------------------------------|-------------------|-------------|-----------|
|                                  | Overpotential(mV) | Electrolyte |           |
| Ni/MoN/rNS                       | 370 mV            | 1.0 M KOH   | This work |
| LIG-NiFe                         | 410 mV            | 1.0 M KOH   | 28        |
| Ni-Mo MS                         | 410 mV            | 1.0 M KOH   | 29        |
| FeNi <sub>2</sub> S <sub>4</sub> | 390 mV            | 1.0 M KOH   | 30        |
| LDH-R@Co(v-Zn)-NCNT              | 423 mV            | 1.0 M KOH   | 31        |
| OLC/Co-N-C                       | 393 mV            | 1.0 M KOH   | 32        |
| CoMoOx/CoMoSx/CoSx               | 400 mV            | 1.0 M KOH   | 33        |
| Ni <sub>3</sub> N-NiMoN          | 418 mV            | 1.0 M KOH   | 34        |
| MoS <sub>2</sub> -AB             | 470 mV            | 1.0 M KOH   | 35        |
| BCNONF                           | 475 mV            | 1.0 M KOH   | 36        |

**Reference:**

1. G. Wang, L. Li, W. Fan, R. Wang, S. Zhou, J.-T. Lü, L. Gan and T. Zhai, *Adv. Funct. Mater.*, 2018, **28**, 1800339.
2. G. Kresse and J. Furthmüller, *Phys. Rev. B*, 1996, **54**, 11169.
3. G. Kresse and D. Joubert, *Phys. Rev. B*, 1999, **59**, 1758-1775.
4. P. E. Blöchl, *Phys. Rev. B*, 1994, **50**, 17953-17979.
5. J. P. Perdew, J. Chevary, S. Vosko, K. A. Jackson, M. R. Pederson, D. Singh and C. Fiolhais, *Phys. Rev. B*, 1992, **46**, 6671-6687.
6. J. P. Perdew and Y. Wang, *Phys. Rev. B*, 1992, **45**, 13244.
7. J. K. Nørskov, T. Bligaard, A. Logadottir, J. R. Kitchin, J. G. Chen, S. Pandalov and U. Stimming, *J. Electrochem. Soc.*, 2005, **152**, J23.
8. X. Li, Y. Wang, J. Wang, Y. Da, J. Zhang, L. Li, C. Zhong, Y. Deng, X. Han and W. Hu, *Adv. Mater.*, 2020, **39**, 2003414.
9. J. Ge, W. Zhang, J. Tu, T. Xia, S. Chen and G. Xie, *small*, 2020, 2001856.
10. X. Liu, W. Li, X. Zhao, Y. Liu, C. W. Nan and L. Fan, *Adv. Funct. Mater.*, 2019, **29**, 1901510.
11. Y. Guo, J. Tang, J. Henzie, B. Jiang, W. Xia, T. Chen, Y. Bando, Y.-M. Kang, M. S. A. Hossain Y. Sugahara and Y. Sugahara, *ACS nano*, 2020, **14**, 4141-4152.
12. J. Guan, C. Li, J. Zhao, Y. Yang, W. Zhou, Y. Wang and G.-R. Li, *Appl. Catal. B*, 2020, **269**, 118600.

13. W. Liu, L. Yu, R. Yin, X. Xu, J. Feng, X. Jiang, D. Zheng, X. Gao, X. Gao and W. Que, P. Ruan, F. Wu, W. Shi and X. Cao, *Small*, 2020, **16**, 1906775.
14. G. Zhou, M. Li, Y. Li, H. Dong, D. Sun, X. Liu, L. Xu, Z. Tian and Y. Tang, *Adv. Funct. Mater.*, 2020, **30**, 1905252.
15. L. Dai, Z. N. Chen, L. Li, P. Yin, Z. Liu and H. Zhang, *Adv. Mater.*, 2020, **32**, 1906915.
16. L. Yang, R. Liu and L. J. Jiao, *Adv. Funct. Mater.*, 2020, **30**, 1909618.
17. J. Balamurugan, T. T. Nguyen, V. Aravindan, N. H. Kim and J. Lee, *Nano Energy*, 2020, **69**, 104432.
18. F. Si, C. Tang, Q. Gao, F. Peng, S. Zhang, Y. Fang and S. Yang, *J. Mater. Chem. A*, 2020, **8**, 3083-3096.
19. C. Wang, X. Shao, J. Pan, J. Hu and X. Xu, 2020, *Appl. Catal. B*, **268**, 118435.
20. Y. Yang, Y. Qian, H. Li, Z. Zhang, Y. Mu, D. Do, B. Zhou, J. Dong, W. Yan, Q. Yong, L. Fang, R. Feng, J. Zhou, P. Zhang, J. Dong, G. Yu, Y. Liu, X. Zhang, and X. Fan, *Sci. Adv.*, 2020, **23**, eaba6586.
21. L. Wang, X. Duan, X. Liu, J. Gu, R. Si, Y. Qiu, Y. Qiu, D. Shi, F. Chen and X. Sun, *Adv. Energy Mater.*, 2020, **10**, 1903137.
22. Y. Li, X. Tan, H. Tan, H. Ren, S. Chen, W. Yang, S. C. Smith, C. J. E. Zhao and E. Science, 2020.
23. H. Yang, X. Chen, G. Hu, W.-T. Chen, S. J. Bradley, W. Zhang, G. Verma, T. Nann, D.-e. Jiang and P. Kruger, X. Wang, S. Telfer and S. Ma, *Chem. Sci.*, 2020, **11**, 3523-3530.
24. Y. Li, B. Liu, H. Wang, X. Su, L. Gao, F. Zhou and G. Duan, *Sci. China Mater.*, 2018, **61**, 1575-1586.
25. H. Song, Y. Li, L. Shang, Z. Tang, T. Zhang and S. Lu, *Nano Energy*, 2020, 104730.
26. S. Anantharaj, S. Kundu and S. Noda, *J. Mater. Chem. A*, 2020, **8**, 4174-4192.
27. S.-Y. Lu, S. Li, M. Jin, J. Gao and Y. Zhang, *Appl. Catal. B*, 2020, **267**, 118675.
28. J. Zhang, C. Zhang, J. Sha, H. Fei, Y. Li and J. M. Tour, *ACS Appl. Mater. Interfaces*, 2017, **9**, 26840-26847.
29. M. Y. Gao, C. Yang, Q. B. Zhang, J. R. Zeng, X. T. Li, Y. X. Hua, C. Y. Xu and P. Dong, *Journal of Materials Chemistry A*, 2017, **5**, 5797-5805.
30. J. Jiang, Y.-J. Zhang, X.-J. Zhu, S. Lu, L.-L. Long and J.-J. Chen, *Nano Energy*, 2021, **81**, 105619.
31. W. Yang, Y. Bai, J. Ma, Z. Wang, W. Sun, J. Qiao, H. Cai and K. Sun, *J. Mater. Chem. A*, 2020, **8**, 25268-25274.
32. Z. Liang, N. Kong, C. Yang, W. Zhang, H. Zheng, H. Lin and R. Cao, *Angew. Chem. Int. Ed.*, 2021, **60**, 12759-12764.
33. H. Xu, H. Shang, C. Wang, L. Jin, C. Chen, C. Wang and Y. Du, *Appl. Catal. B*, 2020, **265**, 118605.
34. A. Wu, Y. Xie, H. Ma, C. Tian, Y. Gu, H. Yan, X. Zhang, G. Yang and H. Fu, *Nano Energy*, 2018, **44**, 353-363.
35. L. Guo, Q. Liu, Y. Liu, Z. Chen, Y. Jiang, H. Jin, T. Zhou, J. Yang and Y. Liu, *Nano Energy*, 2022, **92**, 106707.

36. H. Li, B. Ren, W. Liu, L. Jing, R. Y. Tay, S. H. Tsang, L. Ricardez–Sandoval, A. Yu and E. H. T. Teo, *Nano Energy*, 2021, **88**, 106246.
